# Supplementary material
Source: PubMed Central journal article supplement (PMC1383534)
Supplement: 7600950s2.pdf [file 7600950s2.pdf]

**Supplementary Table 1 (Ahn et al.)**

**Rosette leaves ( $\pm 2 \times$  standard error of the mean) at flowering of transgenic *ft tfl1* plants overexpressing chimeric genes in the T2 generation.**

| Plant          | Line Number | T1 generation  |                        | T2 generation  |                        |                |
|----------------|-------------|----------------|------------------------|----------------|------------------------|----------------|
|                |             | Rosette leaves | Phenotype <sup>a</sup> | Rosette leaves | Phenotype <sup>a</sup> | n <sup>b</sup> |
| pJA1126        | 2           | 4              | E                      | 3.67 $\pm$ 0.8 | E                      | 6              |
| pJA1129        | 9           | 45             | L                      | 46.3 $\pm$ 4.1 | L                      | 6              |
| pJA1057        | 2           | 46             | L                      | 37.3 $\pm$ 1.4 | L                      | 15             |
| pJA1057        | 12          | 29             | I                      | 25.3 $\pm$ 0.8 | I                      | 15             |
| pJA1063        | 1           | 18             | E                      | 16.9 $\pm$ 2.8 | E                      | 14             |
| pJA1063        | 6           | 31             | I                      | 25.3 $\pm$ 1.0 | I                      | 15             |
| pJA1122        | 1           | 46             | L                      | 47.3 $\pm$ 1.5 | L                      | 14             |
| <i>ft tfl1</i> |             | 28.6 $\pm$ 0.8 |                        | 26.1 $\pm$ 0.8 |                        | 15             |

<sup>a</sup> E: early flowering, L: late flowering, I: intermediate flowering

<sup>b</sup> number of plants measured
