# Supplementary material
Source: PubMed Central journal article supplement (PMC1383534)
Supplement: 7600950s3.pdf [file 7600950s3.pdf]

## Supplementary Table S2 (Ahn et al.)

### Accession numbers and amino acid sequences of TFL1 and FT homologs.

| TFL1 subfamily                                                                                                                                                                                                   |
|------------------------------------------------------------------------------------------------------------------------------------------------------------------------------------------------------------------|
| >Cs TFL AY344245<br>MAARMLEPLAVGGVIGDVIESFTPSIKMSVTYDNKQVCNGHELFPSTVVS KPRVEIQGGDMRSFFTLVMTD<br>PDVPGSPDPYLREHLHWIVTDIPGTTDATFGRELVSYEIPRPNIGIHRFVFLFKQTRRQTVNPPSSRDHF<br>NTRFAAENDLGLPVAAVVFNAQRETAARRR         |
| >Nt CET1 AF145259<br>MASRVVEPLVVARVIGEVVDSFNPSVKLNVIYNGSKQVFNHGLMPPAVIAAKPRVEIGGEDMRSAYTLIMT<br>DPDVPGPSDPYLREHLHWIVTDIPGSTDSSFGREIVSYESP KPVIGIHRVLLLLYKQSGRQTVKPAATR DH<br>FNTRYTAENGLGSPVAAVVFNAQRETAARRR     |
| >Nt CET2 AF145260<br>MGSKMSDPLVIGRVIGEVVDYFTPSVKMSVTYNSSKHVYNGHELFPSSVTSKPRVEVHGDLRSFFTMIMI<br>DPDVPGPSDPYLREHLHWIVTDIPGTTDCSFGKEIVGYEMPRPNIGIHRFVFLFKQKKRQTVLTAPLSRD<br>RFNTRKFAEENELGSPVAAVFFNCQRETAARRR       |
| >Nt CET4 AF145261<br>MGSKMSDPLVIGRVIGEVVDYFTPSVKMSVTYNSSKHVYNGHELFPSSVTSKPRVEVHGDLRSFFTLIMI<br>DPDVPGPSDPYLREHLHWIVTDIPGTTDCSFGREIVGYEMPRPNIGIHRFVFLFKQKKRQTLLSAPLSRD<br>RFNTRKFSEENELGSPVAAAFFNCQRETAARRR       |
| >Nt CET5 AF145262<br>AVTIRPRVEVQGGDMRTFFTLVITDPDVPGPSDPYLREHVHWIVTDIPGTTDATFGKELVSYEIPRPNIGI<br>HRFVFLFKQKCRQSVSPPTS RDHFNTRNFANVNDLGPVAAVFFNA                                                                   |
| >Le SP U84140<br>MASKMCEPLVIGRVIGEVVDYFCPSVKMSVVYNNKHVYNGHEFFPSSVTSKPRVEVHGDLRSFFTLIMI<br>DPDVPGPSDPYLREHLHWIVTDIPGTTDCSFGREVVGYEMPRPNIGIHRFVFLFKQKKRQTISSAPVSRD<br>QFSSRKFSEENELGSPVAAVFFNCQRETAARRR            |
| >Le SP9D AY186738<br>MARSLEPLIVGRVIGDVIDSFNPTIKMSITYNNKLV CNGHELFPSSVSSRPKVEVQGGDLRTFFTLVMTDP<br>DVPGPSDPYMRHLHWIITDIPGTTDATFGRELVSYETPRPNIGIHRFVFLFKQKSRSSVSQPTSRDHFN<br>TRNFAQENNLQPVTA VFFNAQRETAARRR         |
| >Am CEN S81193<br>MAAKVSSDPLVIGRVIGDVVDHFTSTVKMSVIYNSNNSIKHVYNGHELFP SAVTSTPRVEVHGDMRSFFT<br>LIMTDPDVPGPSDPYLREHLHWIVTDIPGTTDSSFGKEVVS YEMPRPNIGIHRFVFLFKQKKRGQAMLS P<br>PVVCRDGFNTRKFTQENELGLPVAAVFFNCQRETAARRR |
| >Ej E jTFL1 AB162045<br>MTRALEPLVVGRVIGDVLDSFTATTKMSVTYNTKLV CNGLELFPSSVVTAKPRVEIQGGDMRSFFTLVMTDP<br>DFPGPSDPYLREHLHWIVTDIPGTTDATFGREVVS YEMPRPNIGIHRFVFLFKQNRQSI NTPSSRDHFS<br>TRSFAAENDLGLPVAAVVFNAQRETAARRR   |
| >Md MdTFL1 AB052994<br>MKRASEPLVVGRVIGDVLDSFTATTKMSVTYNTKLV CNGLELFPSSVVTAKPRVEIQGGDMRSFFTLVMTDP<br>DFPGPSDPYLREHLHWIVTDIPGTTDATFGREVVS YEMPKPNIGIHRFVFLFKQNRQSI NTPSSRDHFS<br>TRSFAAENDLGLPVAAVVFNAQRETAARRR    |
| >Pc PcTFL1 AB162042<br>MKRASEPLVVGRVIGDVLDSFTATTKMSVTYNTKLV CNGLELFPSSVVTAKPRVEIQGGDMRSFFTLVMTDP<br>DFPGPSDPYLREHLHWIVTDIPGTTDATFGREVVS YEMPKPNIGIHRFVFLFKQNRQSI NTPSSRDHFS<br>TRSFAAENDLGLPVAAVVFNAQRETAARRR    |
| >Pn PnFTL3b AB181240<br>MANLS DPLVVGRVIGDVIDYFTPNVKMTVTYNSNKQVYNGHELFP SAVTHKPKVEVHGDMRSFFTLVMTD<br>PDVPGSPDPYLREHLHWIVTDIPGTTDATFGREVV NYEMPRPNIGIHRFVYLLFRQKGRQTVSTPSSRDKF<br>NTRKFAEENELDLPVAAVVFNAQRETAARRR  |
| >Pn PnTFL1c AB104629<br>MAKMSEPLVVGRVIGDVIDHFTANVKMTVTYQSNRKQVFNHGLFP SAVTHKPKVEVHGDMRSFFTLVMT<br>DPDVPGPSDPYLREHLHWIVTDIPGTTDATFGREVM NYEMPRPNIGIHRFVFLFKQKGRQTVTTPASRDK<br>FNTRKFAEENELGLPVAAVVFNAQRETAARRR    |
| >Pn PnFTL1a AB181183<br>MAKMSEPLVVGRVIGDVIDHFTANVKMTVTYQSSRKQVFNHGLFP SAVTNKPKVEVHGDMRSFFTLVMT<br>DPDVPGPSDPYLREHLHWIVTDIPGTTDATFGREVM NYEMPRPNIGIHRFVFLFKQKGRQTVTTPASRDK<br>FNTRKFAEENELGLPVAAVVFNAQRETAARRR    |

|                                                                                                                                                                                                                                   |
|-----------------------------------------------------------------------------------------------------------------------------------------------------------------------------------------------------------------------------------|
| <p>&gt;Lj CEN1 AY423715<br/> MSKIMSTDPLVVGRVVGVDVLDSTTSMKLTVSFNNKQVFNHGEFFPSTINTKPKVDIGGGDMRSFFTLIMT<br/> DPDVPGPSDPYLKEHLHWIVTDIPGTTDATFGKELVSYEIPKPNIGIHRFVFLFKQRRQCVSPSSRDH<br/> FNTRSFQAQNDLALPVAAYVFNAQRETAARRR</p>          |
| <p>&gt;Ps TFL1a AY340579<br/> MARMAQEPLIVGRVIGEVLDSFTTSMKMTVSYNKKQVFNHGEFFPSTINTKPKVEIDGADMRSFYTLVMTD<br/> PDVPGPSDPYLREHLHWIVTDIPGTTDATFGKEIVSYEIPKPNIGIHRFVFLFKQRRQCVSPSSRDH<br/> FNTRSFASQNDLGLPVAAYVFNAQRETAARRR</p>          |
| <p>&gt;At TFL1 U77674<br/> MENMGTRVIEPLIMGRVVGVDVLDFFTPPTTKMNVSYNKKQVSNHGEFLPSSVSSKPRVEIHGGDLRSFFTLV<br/> MIDPDVPGPSDPFLKEHLHWIVTNIPTGTTDATFGKEVVSVELPRPSIGIHRFVFLFKQRRQCVSPSSRDH<br/> RDHFNTRKFAVEYDLGLPVAAYVFNAQRETAARRR</p>    |
| <p>&gt;At ATC AB024714<br/> MARISSDPLMVGGRVIGDVVDNCLQAVKMTVTYNSDKQVYNGHEFLPSSVVTYKPKVEVHGGDMRSFFTLVMT<br/> DPDVPGPSDPYLREHLHWIVTDIPGTTDVSFGKEIIGYEMPRPNIGIHRFVYLLFKQTRRGSVSVPSYRD<br/> QNTREFAHENDLGLPVAAYVFNCQRETAARRR</p>       |
| <p>&gt;Os FL cDNA TFL1 AK110622<br/> MSRVLEPLVVGKVI GEVIDNFNPTVKMTATYSSNKQVFNHGEFLPSSAVVSKPRVEVQGGDLRSFFTLVMTD<br/> PDVPGPSDPYLREHLHWIVTDIPGTTDASFGREVVSYESPKPNIGIHRFVFLFKQRRQAVTPSSRDYF<br/> STRRFAADNDLGLPVAAYVFNAQRETAARRR</p> |
| <p>&gt;Os FDR1 AF159883<br/> MSRSVEPLVVGRVIGEVIDSFNPTCKMIVTYNSNKLVFNGHEFYPSAVVSKPRVEVQGGDMRSFFTLVMTD<br/> PDVPGPSDPYLREHLHWIVTDIPGTTDASFGREIISYESPKPSIGIHRFVFLFKQRRQAVVVPSSRDHF<br/> NTRQFAEENELGLPVAAYVFNAQRETAARRR</p>          |
| <p>&gt;Os FDR2 AF159882<br/> MSRSVEPLVVGRVIGEVLDTFNPCMKMIVTYNSNKLVFNGHELYPSAVVSKPRVEVQGGDLRSFFTLVMTD<br/> PDVPGPSDPYLREHLHWIVTDIPGTTDASFGREVISYESPKPNIGIHRFIFVFLFKQRRQTVIVPSFRDHF<br/> NTRRFAEENDLGLPVAAYVFNAQRETAARRR</p>        |
| <p>&gt;Lp TFL1 AF316419<br/> MSRSVEPLIVGRVIGEVLDPFNPCVKMIVTYNSNKLVFNGHELYPSAVVSKPRVEVQGGDLRSFFTLVMTD<br/> PDVPGPSDPYLREHLHWIVSNIPGTTDASFGGEVMSYESPKPNIGIHRFIFVFLFKQRRQTVSVPSFRDHF<br/> NTRQFAVDNDLGLPVAAYVFNCQRETAARRR</p>        |
| <p>&gt;Ta FDR1 AJ577366<br/> VTYSSNKQVFNHGEFFPSSAVVSKPRIEVQGGDMRSFFTLVMTD PDVPGPSDPYLREHLHWIVSDIPGTTDA<br/> SFGREVVSYESPKPNIGIHRFTFVFLFQKKRQAMNPPSTRDYFNTRRFANENDLGLPVAAYVFNAQRETA<br/> ARRR</p>                                  |

| <b>FT subfamily</b>                                                                                                                                                                                                                     |
|-----------------------------------------------------------------------------------------------------------------------------------------------------------------------------------------------------------------------------------------|
| <p>&gt;Cu CiFT AB027456<br/> MSSRERDPLIVGRVVGDVLDNFTRTIPMRITYSNKDVNNGRELKPSSEVLNQPRAEIGDDLRTFYTLVMVD<br/> PDAPSPSDPSLREYLHHLVTDIPATTGASFGQEI VNYESPRPTMGIHRFVFLFRQLGRQTVYAPGWRQNF<br/> STRDFAELYNLGPPVAAVYFNCQRESGSGGRPVRR</p>          |
| <p>&gt;Le SP3D AY186735<br/> MPRERDPLVVGRVVGDVLDPFTRTIGLRVIYRDREVNNGCELKPSQVINQPRVEVGGDDLRTFFTLVMVDP<br/> DAPSPSDPNLREYLHHLVTDIPATTGSSFGQEI VSYESPRPSMGIHRFVFLFRQLGRQTVYAPGWRQNF<br/> TRDFAELYNLGLPVAAVYFNCQRESGSGGRRRSAD</p>           |
| <p>&gt;Le SP6A AY186737<br/> MPRVDPPLIVGRVIGEVLDPFTRSVDLRVVYNNREVNACVLKPSQVVMQPKVYIGDDLRTFYTLIMVDPD<br/> APSPSPNPNLREYLHHLVTDIPATTDRFGNEIVCYENPTPTMGIHRFVFLFRQLGRETVYPPGWRQNF</p>                                                       |
| <p>&gt;Md AB161112<br/> MPRDRDPLVVGRVVGDVLDPFTRSVSLRVTYGTKEVNNGCELKPSSEVVQQPRADIGDDLRTFYTLVMVDP<br/> DAPSPSDPNLKEYLHHLVTDIPATTAASFGQEI VCYESPRPTVGIHRFVFLVFRQLGRQTVYAPGWRQNF<br/> TRDFAELYNLGLPVSVVYFNCQREGGSGGRRR</p>                  |
| <p>&gt;Pn PnFT1b AB161109<br/> MPRDREPLSVGRVIGDVLDPFTRTSISLRVNYNSREVNNGCELKPSHVVNQPRVDIGGEDLRTFYTLVMVDP<br/> DAPSPSPNPNLREYLHHLVTDIPATTGANFGQEVMCYESPRPTAGIHRFVFLFRQLGRQTVYAPGWRQNF<br/> TRDFAELYNLGSPVAAVYFNCQRESGSGGRRP</p>           |
| <p>&gt;Pn PnFT2c AB110613<br/> MPRDREPLSVGRVIGDVLDPFTRTSISLRVNYNSREVNNGCELKPSHVVNQPRVDIGGEDLRTFYTLVMVDP<br/> DAPSPSPNPNLREYLHHLVTDIPATTGANFGQEVVCYESPRPTAGIHRFVFLFRQLGRQTVYPPGWRQNF<br/> TRDFAELYNLGSPVAAVYFNCQRESGSGGRRP</p>           |
| <p>&gt;At FT AF152096<br/> MSINIRDPLIVSRVVGDVLDPFNRSITLKVITYGQREVTNGLDLRPSQVQNKPRVEIGGEDLRNFYTLVMVD<br/> PDVPSPSNPHLREYLHHLVTDIPATTGTTFGNEIVCYENPSPTAGIHRVVFILFRQLGRQTVYAPGWRQNF<br/> NTREFAEIYNLGLPVAAVYFNCQRESGCGGRRL</p>             |
| <p>&gt;At TSF AF152907<br/> MSLSRRDPLVVGSVVGDVLDPFTRLVSLKVITYGHREVTNGLDLRPSQVLNKPIVEIGDDFRNFYTLVMVD<br/> PDVPSPSNPHQREYLHHLVTDIPATTGNAFGNEVVCYESPRPPSGIHRIVLVLFRQLGRQTVYAPGWRQQF<br/> NTREFAEIYNLGLPVAAVYFNCQRENGCGGRRT</p>             |
| <p>&gt;Os Hd3A AB052941<br/> MAGSGRDRDPLVVGRVVGDVLDVAFVVRSTNLKVITYGSKTVSNGCELKPSMVTHQPRVEVGGNDMRTFYTLVM<br/> VDPDAPSPSDPNLREYLHHLVTDIPGTTAASFGQEVMCYESPRPTMGIHRLVFLVFLFQQLGRQTVYAPGWRQ<br/> NFNTKDFAEIYNLGLPVAAVYFNCQREAGSGGRRVYN</p>   |
| <p>&gt;Os FL cDNA FT AK072979<br/> MSGRGRGDPLVLGRVVGDVVDPFVRRVALRVAYGAREVANGCELKPSAVADQPRVAVGGPDMRTFYTLVMV<br/> DPDAPSPSDPNLREYLHHLVTDIPATTGVVSGTEVVVCYESPRPVLGIHRLVFLVFLFEQLGRQTVYAPGWRQ<br/> NFSTRDFAELYNLGPPVAAVYFNCQRESGTGGRRM</p>  |
| <p>&gt;Ta Hd3a TAE577367<br/> MAGRDRDPLVVGRVVGDVLDPFIRTTNLRVTFGNRTVSNNGCELKPSMVAQQPRVEVGGNEMRTFYTLVMVD<br/> PDAPSPSDPNLREYLHHLVTDIPGTTGASFGQEVMCYESPRPTMGIHRFVFLVFLVFLQQLGRQTVYAPGWRQ<br/> NFNTRDFAELY</p>                              |
| <p>&gt;Ta FL cDNA FT BT009051<br/> MHAQRGDPLVVGRVIGDVVDPFVRRVALRVGYASRDVANGCELKPSAIADPPRVEVGGPDMRTFYTLVMVD<br/> PDAPSPSDPSLREYLHHLVTDIPATTGVVSGTEVVVCYEGPRPVLGIHRLVFLVFLVFLQQLGRQTVYAPGWRQ<br/> NFSTRDFAELYNLGLPVAAVYFNCQRETGTGGRRM</p> |
| <p>&gt;Zm partial FT AY111549<br/> MAGRDREPXXXXXXXXXDVLDPFVRTTNLRVSYGARTVSNNGCELKPSMVVHQPRVEVXXPDMRTFYTLVMVD<br/> PDAPSPSDPNLREYLHHLVTDIPGTTGAAFGQEVICYESPRPTMGIHRFVFLVFLVFLQQLGRQTVYAPGWRQ<br/> NFNTRDFAELYXXXXXXXXXXFNCQREAGSXXRR</p> |

| <b>BFT and MFT subfamily</b>                                                                                                                                                                                            |
|-------------------------------------------------------------------------------------------------------------------------------------------------------------------------------------------------------------------------|
| >Le SP5G AY186736<br>MPRDPLIVSGVVDVDFPFRTRCVDFGVVYNNRVVYNGCSLQVNVQPRVDIDGDDLRTFYTLIMVDPDA<br>PNPSNPNLREYLHWLVTDI PAATGATFGNEVVGYESPRPSMGIHRYIFVLYRQLGCAIDAPDIIDSRQNF<br>NTRDFARFHNGLGLPVAAYVFNCRREGGTGGRRLL             |
| >Le SP2G AY186734<br>METSARSVDPLVVGKVIQDVLDMFVPPVDFVVEYASKQISNNGVEIKPAEAAQKPRVHIKGSLSHNNLYTL<br>VMADPDAPSPSEPTFREWLHWIVTDIPEGGDASQGREMVEYMGPKPPAGIHRVYVFTLFRQKEAEQVPHKPP<br>QGRSNFKTRQFASDNGLDLPVAALYFNSQKEHAAHH        |
| >Pn AB181241<br>MAASVDPLVVGKVIQDVLDMFVPPVDFVVEYASKQISNNGVEIKPAEAAQKPRVHIKGSLSHNNLYTL<br>VMADPDAPSPSEPTFREWLHWIVTDIPEGGDASQGREMVEYMGPKPPAGIHRVYVFTLFRQKEAEQVPHKPP<br>QGRSNFKTRQFASDNGLDLPVAALYFNSQKEHAAHH                |
| >At BFT NM_125597<br>MSREIEPLIVGRVIGDVLDMFVPPVDFVVEYASKQISNNGVEIKPAEAAQKPRVHIKGSLSHNNLYTL<br>VMADPDAPSPSEPTFREWLHWIVTDIPEGGDASQGREMVEYMGPKPPAGIHRVYVFTLFRQKEAEQVPHKPP<br>QGRSNFKTRQFASDNGLDLPVAALYFNSQKEHAAHH           |
| >At MFT AF147721<br>MAASVDPLVVGKVIQDVLDMFVPPVDFVVEYASKQISNNGVEIKPAEAAQKPRVHIKGSLSHNNLYTL<br>VMADPDAPSPSEPTFREWLHWIVTDIPEGGDASQGREMVEYMGPKPPAGIHRVYVFTLFRQKEAEQVPHKPP<br>QGRSNFKTRQFASDNGLDLPVAALYFNSQKEHAAHH            |
| >Os FL cDNA MFT AK107056<br>MASHVDPLVVGKVIQDVLDMFVPPVDFVVEYASKQISNNGVEIKPAEAAQKPRVHIKGSLSHNNLYTL<br>VMADPDAPSPSEPTFREWLHWIVTDIPEGGDASQGREMVEYMGPKPPAGIHRVYVFTLFRQKEAEQVPHKPP<br>QGRSNFKTRQFASDNGLDLPVAALYFNSQKEHAAHH    |
| >Ta FL cDNA MFT BT008995<br>MAAHVDPLVVGKVIQDVLDMFVPPVDFVVEYASKQISNNGVEIKPAEAAQKPRVHIKGSLSHNNLYTL<br>VMADPDAPSPSEPTFREWLHWIVTDIPEGGDASQGREMVEYMGPKPPAGIHRVYVFTLFRQKEAEQVPHKPP<br>QGRSNFKTRQFASDNGLDLPVAALYFNSQKEHAAHH    |
| >Zm Contig425 MFT BT016592<br>MAAAHVDPLVVGKVIQDVLDMFVPPVDFVVEYASKQISNNGVEIKPAEAAQKPRVHIKGSLSHNNLYTL<br>VMADPDAPSPSEPTFREWLHWIVTDIPEGGDASQGREMVEYMGPKPPAGIHRVYVFTLFRQKEAEQVPHKPP<br>QGRSNFKTRQFASDNGLDLPVAALYFNSQKEHAAHH |

Amino acid sequences are given in FASTA format. Species abbreviation: *Am*, *Antirrhinum majus*, *At*, *Arabidopsis thaliana*, *Cs*, *Citrus sinensis*, *Cu*, *Citrus unshiu*, *Ej*, *Eriobotrya japonica*, *Le*, *Lycopersicon esculentum*, *Lj* *Lotus japonicus*, *Lp*, *Lolium perenne*, *Md*, *Malus domestica*, *Nt*, *Nicotiana tabacum*, *Pc*, *Pyrus communis*, *Pn*, *Populus nigra*, *Ps*, *Pisum sativum*, *Os*, *Oryza sativa*, *Ta*, *Triticum aestivum*, *Zm*, *Zea mays*

The following TFL1 homologs have been confirmed as having the same in vivo activity as *Arabidopsis* TFL1: *Am* CEN (Bradley *et al*, 1996), *Le* SP (Pnueli *et al*, 1998), *At* TFL1 (Bradley *et al*, 1997), *Lp* CEN (Jensen *et al*, 2001), *At* ATC (Mimida *et al*, 2001), *Os* RCN1 and RCN2 (=FDR1 and FDR2) (Nakagawa *et al*, 2002), *Ps* TFL1a (Foucher *et al*, 2003), *Cs* TFL1 (Pillitteri *et al*, 2004).

The following FT homologs have been confirmed in vivo as having the same activity as *Arabidopsis* FT: *At* FT (Kardailsky *et al*, 1999; Kobayashi *et al*, 1999), *Os* Hd3a

(Kojima *et al*, 2002), *At* TSF (Michaels *et al*, 2005)

Bradley D, Carpenter R, Copsey L, Vincent C, Rothstein S, Coen E (1996) Control of inflorescence architecture in *Antirrhinum*. *Nature* **379**: 791-797.

Bradley DJ, Ratcliffe OJ, Vincent C, Carpenter R, Coen ES (1997) Inflorescence commitment and architecture in *Arabidopsis*. *Science* **275**: 80-83.

Foucher F, Morin J, Courtiade J, Cadioux S, Ellis N, Banfield MJ, Rameau C (2003) *DETERMINATE* and *LATE FLOWERING* are two *TERMINAL FLOWER1/CENTRORADIALIS* homologs that control two distinct phases of flowering initiation and development in pea. *Plant Cell* **15**: 2742-2754.

Jensen CS, Salchert K, Nielsen KK (2001) A *TERMINAL FLOWER1*-like gene from perennial ryegrass involved in floral transition and axillary meristem identity. *Plant Physiol* **125**: 1517-1528.

Kardailsky I, Shukla V, Ahn JH, Dagenais N, Christensen SK, Nguyen JT, Chory J, Harrison MJ, Weigel D (1999) Activation tagging of the floral inducer *FT*. *Science* **286**: 1962-1965.

Kobayashi Y, Kaya H, Goto K, Iwabuchi M, Araki T (1999) A pair of related genes with antagonistic roles in mediating flowering signals. *Science* **286**: 1960-1962.

Kojima S, Takahashi Y, Kobayashi Y, Monna L, Sasaki T, Araki T, Yano M (2002) *Hd3a*, a rice ortholog of the *Arabidopsis FT* gene, promotes transition to flowering downstream of *Hd1* under short-day conditions. *Plant Cell Physiol* **43**: 1096-1105.

Michaels SD, Himelblau E, Kim SY, Schomburg FM, Amasino RM (2005) Integration of flowering signals in winter-annual *Arabidopsis*. *Plant Physiol* **137**: 149-156.

Mimida N, Goto K, Kobayashi Y, Araki T, Ahn JH, Weigel D, Murata M, Motoyoshi F, Sakamoto W (2001) Functional divergence of the *TFL1*-like gene family in *Arabidopsis* revealed by characterization of a novel homologue. *Genes Cells* **6**: 327-336.

Nakagawa M, Shimamoto K, Kozuka J (2002) Overexpression of *RCN1* and *RCN2*, rice

*TERMINAL FLOWER 1/CENTRORADIALIS* homologs, confers delay of phase transition and altered panicle morphology in rice. *Plant J* **29**: 743-750.

Pillitteri LJ, Lovatt CJ, Walling LL (2004) Isolation and characterization of a *TERMINAL FLOWER* homolog and its correlation with juvenility in citrus. *Plant Physiol* **135**: 1540-1551.

Pnueli L, Carmel-Goren L, Hareven D, Gutfinger T, Alvarez J, Ganai M, Zamir D, Lifschitz E (1998) The *SELF-PRUNING* gene of tomato regulates vegetative to reproductive switching of sympodial meristems and is the ortholog of *CEN* and *TFL1*. *Development* **125**: 1979-1989.
