# Supplementary material
Source: PubMed Central journal article supplement (PMC1383534)
Supplement: 7600950s4.pdf [file 7600950s4.pdf]

### Supplementary Table S3 (Ahn et al.)

#### Codon substitution rates in segments B and C.

|                      | sites      |               | $\pi_s$ | $\pi_a$ |
|----------------------|------------|---------------|---------|---------|
|                      | synonymous | nonsynonymous |         |         |
| Segment B (39 sites) |            |               |         |         |
| TFL1 (18 sequences)  | 9.74       | 29.26         | 0.71036 | 0.27318 |
| FT (10 sequences)    | 10.68      | 28.32         | 0.68639 | 0.02117 |
| Segment C (81 sites) |            |               |         |         |
| TFL1 (18 sequences)  | 18.51      | 62.49         | 0.73415 | 0.14216 |
| FT (10 sequences)    | 18.68      | 62.32         | 0.70656 | 0.07644 |

Only complete sequences were considered.

Synonymous sites: Average number of sites at which mutations can cause changes that do not affect the encoded amino acid.

Nonsynonymous sites: Average number of sites at which mutations can cause changes that change the encoded amino acid.

$\pi_s$ : Average pairwise fraction of changes at synonymous sites.

$\pi_a$ : Average pairwise fraction of changes at nonsynonymous sites.
