# Supplementary material
Source: PubMed Central journal article supplement (PMC1383534)
Supplement: 7600950s5.pdf [file 7600950s5.pdf]

## Supplementary Table S4 (Ahn et al.)

### Sequences of the primers used in this study.

| Primer              | Sequence <sup>a</sup>                                     |
|---------------------|-----------------------------------------------------------|
| JH1061              | 5'-ATGTCTATAAATATAAGAGACCCTCTTATAGTAA-3'                  |
| JH1062              | 5'-CAAAGTATAGAAGTTCCTGAGGTCTT-3'                          |
| JH1063              | 5'-CAATGGAGATATTCTCGGAGGT-3'                              |
| JH1064              | 5'-CAAAGGTTGTTCCAGTTGTAGCA-3'                             |
| JH1065              | 5'-CTAAAGTCTTCTTCCTCCGCA-3'                               |
| JH1066              | 5'-atggagaatatgggaactagag-3'                              |
| JH1067              | 5'-CCTCAGGAACTTCTATACTTTGgtgatgatagaccagatgttc-3'         |
| JH1068              | 5'-TCACCTCCGAGAATATCTCCATTGgatcggtacaacattcccgg-3'        |
| JH1069              | 5'-TGCTACAACCTGGAACAACCTTTGgcaaagaggtggtgagctatg-3'       |
| JH1070              | 5'-ctagcgtttgcgtgcagc-3'                                  |
| JH1071              | 5'-gatctcagatccttctcactttgGTTATGGTGGATCCAGATGTTC-3'       |
| JH1072              | 5'-ctttctaaaagaacacctgcactgGTTGGTGACTGATATCCCTGC-3'       |
| JH1073              | 5'-gcacaacagatgctacgtttgGCAATGAGATTGTGTGTTACGAA-3'        |
| JH1074              | 5'-caaagtgaagaaggatctgagatc-3'                            |
| JH1075              | 5'-cagtcaggtgttcttttagaaag-3'                             |
| JH1076              | 5'-caaacgtagcatctgttgc-3'                                 |
| JH1089 <sup>b</sup> | 5'- <u>GAGGTACCAT</u> GTCTATAAATATAAGAGACCCTCTTATAGTAA-3' |
| JH1090 <sup>b</sup> | 5'- <u>GATCTAGACT</u> AAAGTCTTCTTCCTCCGCA-3'              |
| JH1091 <sup>b</sup> | 5'- <u>AAGGTACCA</u> tggagaatatgggaactagag-3'             |
| JH1092 <sup>b</sup> | 5'- <u>TCTCTAGA</u> ctagcgtttgcgtgcagc-3'                 |
| JH1125              | 5'-CTCCCTCTGACAATTGTAGAAAAGT-3'                           |
| JH1126              | 5'-ttctctttgtgcgttaaagaagacg-3'                           |
| JH1127              | 5'-GTTCTGGCGCCACCCTGGT-3'                                 |
| JH1128              | 5'-gtgatctctcgaaggatattaggaa-3'                           |

---

JH1129 5'-CTGTCGAAACAATATAAACACGACAC-3'

JH1130 5'-ctgcctgaacagaacaaacacaaac-3'

JH1131 5'-GTGTCGTGTTTATATTGTTTCGACAGaagcaaagacgtgttatctttcct-3'

JH1132 5'-gtttgtgtttgttctgttcaggcagCTTGGCAGGCAAACAGTGTA-3'

JH1133 5'-ACCAGGGTGGCGCCAGAACTtcaacactcgtaaatttgcggt-3'

JH1134 5'-ttcctaatatcccttcgagagatcacTTCAAACTCGCGAGTTTGCT-3'

JH1135<sup>c</sup> 5'-CTTGGCAGGCAAACAGTGTATGCACCAGGGTGGCGCCAGAAC-3'

JH1136<sup>c</sup> 5'-GTTCTGGCGCCACCCTGGTGCATACTGTTTGCCTGCCAAG-3'

JH1137<sup>c</sup> 5'-aagcaaagacgtgttatctttcctaatatcccttcgagagatcac-3'

JH1138<sup>c</sup> 5'-gtgatctctgaagggatattaggaaagataacacgtctttgctt-3'

---

<sup>a</sup> Oligonucleotide sequences designed from *FT* are denoted in uppercase, whereas those from *TFL1* are designated in lowercase. Synthetic oligonucleotides from JH1061 to JH1076 were for the generation of exon-swapping constructs, whereas those from JH1125 to JH1138 were to produce the segment-swapping constructs within the fourth exon.

<sup>b</sup> The nucleotides underlined denote the sequences for the two synthetic restriction sites, *Kpn* I and *Xba* I, used to facilitate subcloning of the final PCR products.

<sup>c</sup> Primers corresponding to both sense and antisense strand of segment B in the fourth exon.
